# Supplementary material for: A dual polymer composite of poly(3-hexylthiophene) and poly(3,4-ethylenedioxythiophene) hybrid surface heterojunction with g-C3N4 for enhanced photocatalytic hydrogen evolution
Source: Royal Society of Chemistry journal article supplement (doi:10.1039/d1ra05527e), 2021-01-01
Supplement: d1ra05527e1.pdf [file d1ra05527e1.pdf]

## Supporting Information

### **A dual polymer composite of poly(3-hexylthiophene) and Poly(3,4-ethylenedioxythiophene) hybrid surface heterojunction with g-C<sub>3</sub>N<sub>4</sub> for enhanced photocatalytic hydrogen evolution**

Hailian Bao,<sup>a</sup> Xiaodi Chen,<sup>a</sup> Rui Yuan,<sup>a</sup> Chao Zhang\*<sup>a</sup> and Shiai Xu\*<sup>a,b</sup>

*a. School of Chemical Engineering, Qinghai University, Xining 810016, Qinghai, China. E-mail: zhangchaoqhu@126.com*

*b. Shanghai Key Laboratory of Advanced Polymeric Materials, Key Laboratory for Ultrafine Materials of Ministry of Education, School of Materials Science and Engineering, East China University of Science and Technology, Shanghai 200237, China. E-mail: saxu@ecust.edu.cn*

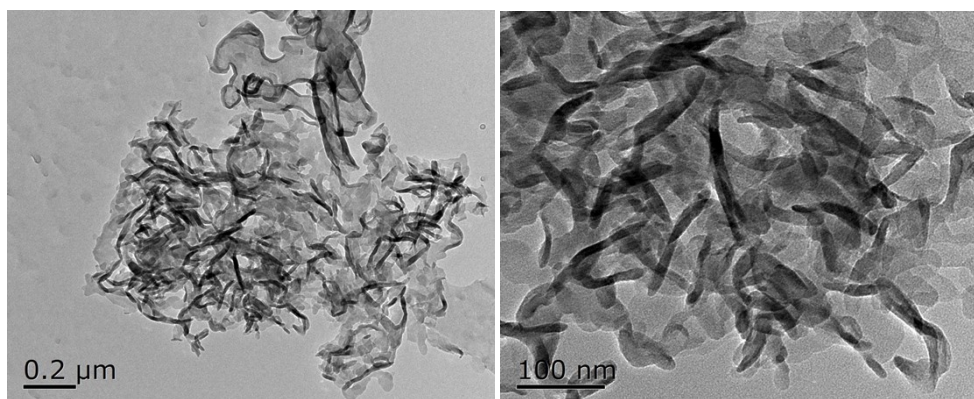

Fig. S1 Typical TEM images of pure g-C<sub>3</sub>N<sub>4</sub>.

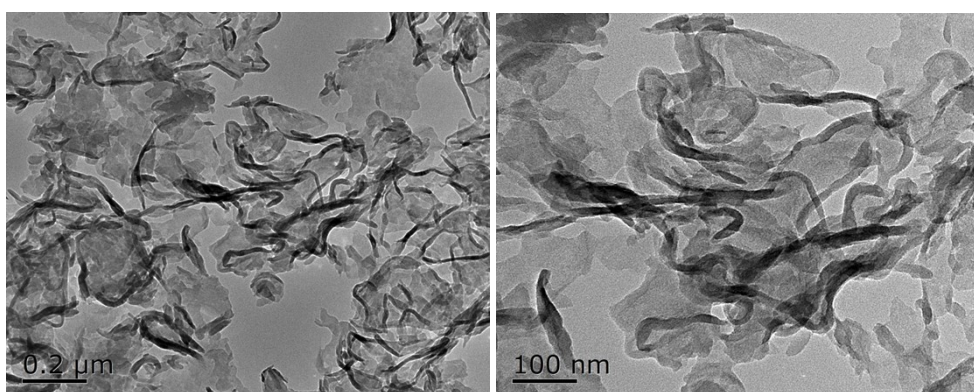

Fig. S2 Typical TEM images of g-C<sub>3</sub>N<sub>4</sub>-PEDOT/P3HT.

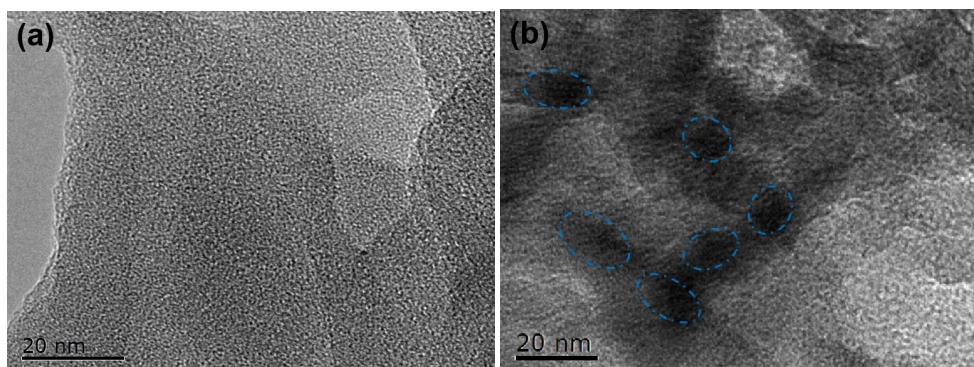

Fig. S3 Typical high resolution TEM (HRTEM) images of the sample, (a) g-C<sub>3</sub>N<sub>4</sub>, (b) g-C<sub>3</sub>N<sub>4</sub>-PEDOT/P3HT.

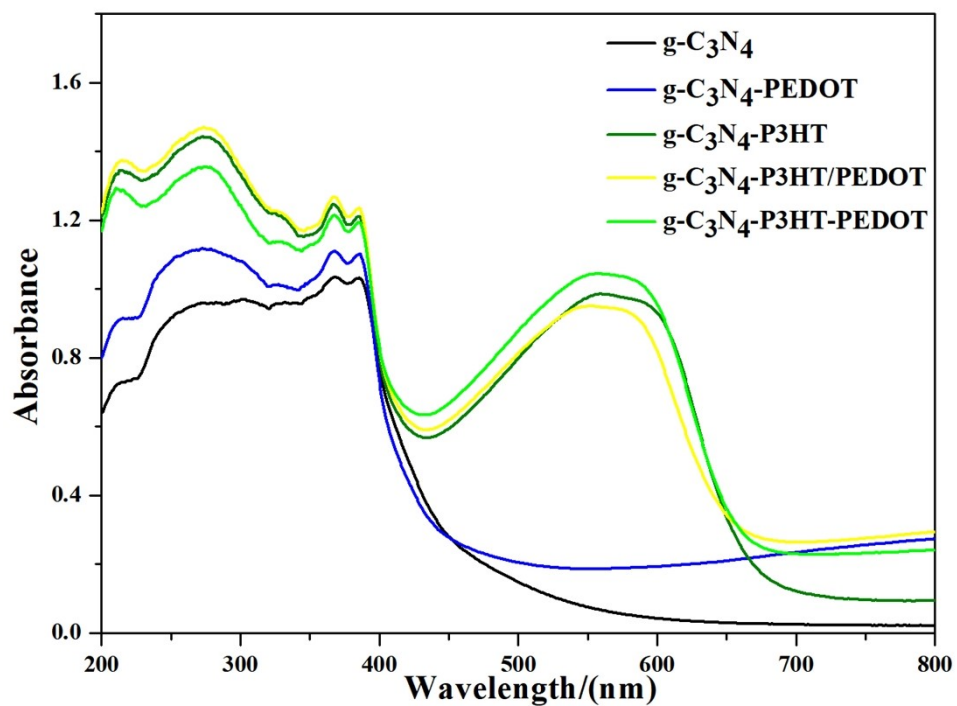

Fig. S4 UV-Vis diffuse reflectance spectra of the as-prepared  $g\text{-C}_3\text{N}_4$ -polymer samples.

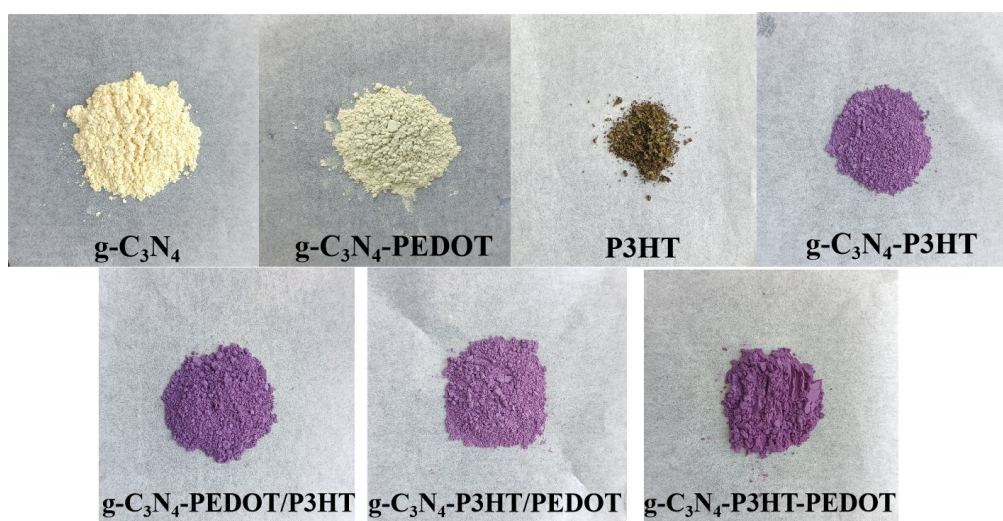

Fig. S5 The ordinary optical photos of the as-prepared  $g\text{-C}_3\text{N}_4$ -polymer samples.

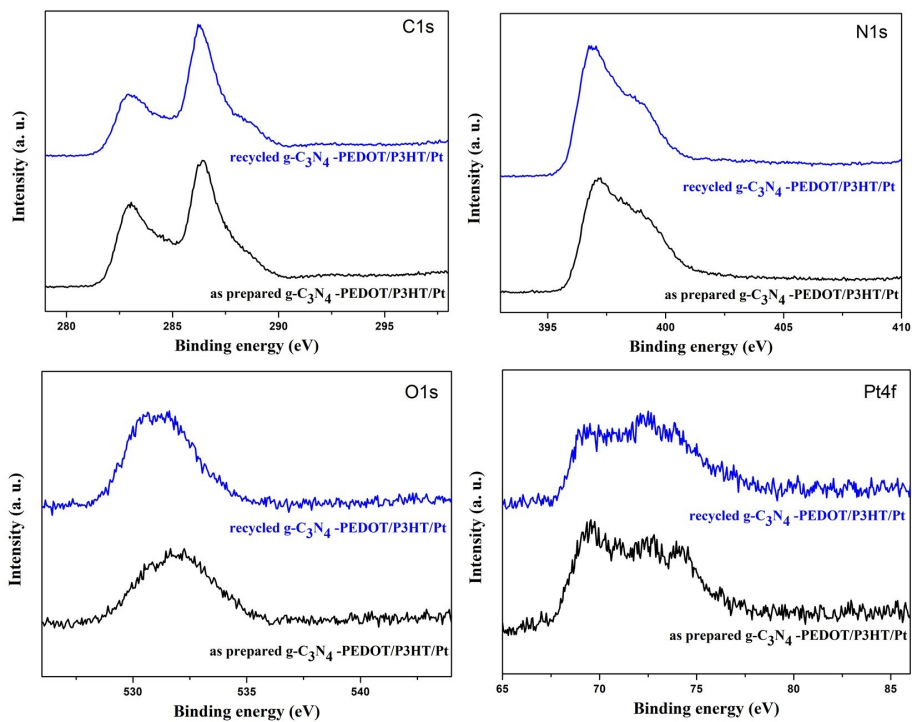

Fig. S6 The XPS spectra of C 1s, N 1s, O 1s and Pt 4f for g-C<sub>3</sub>N<sub>4</sub>-PEDOT/P3HT/Pt composite before and after stability test in AA solution.

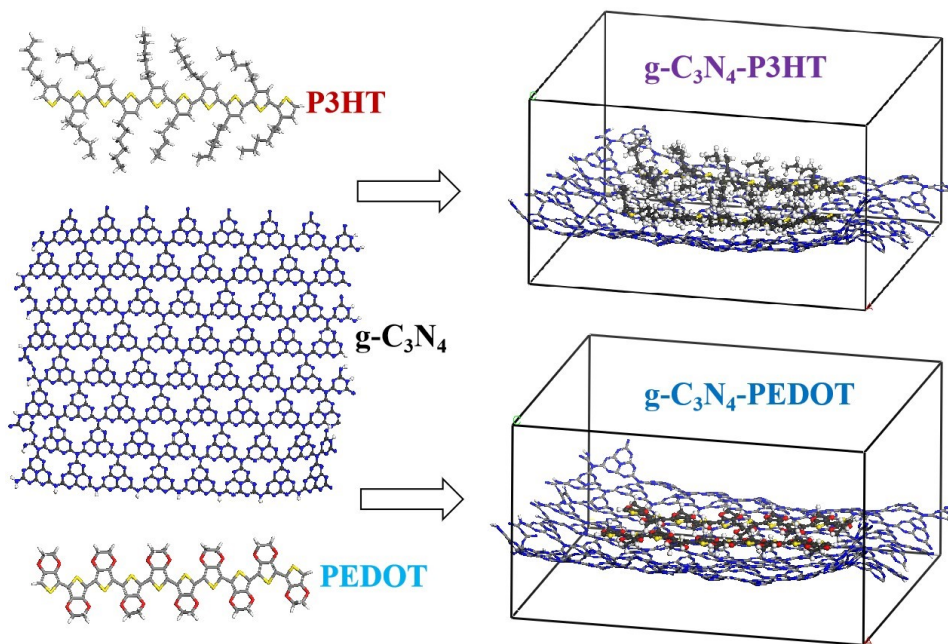

Fig. S7 The molecular structure of monolayer g-C<sub>3</sub>N<sub>4</sub>, the repeat unit chain of PEDOT, P3HT and the composites.

Table S1. The comparison of other polymer dye-sensitized g-C<sub>3</sub>N<sub>4</sub> for photocatalytic H<sub>2</sub> production.

| Photocatalyst                                      | Reaction conditions                                     | Wavelength of incident light( $\lambda$ ) | H <sub>2</sub> production activity                               | AQY/%                                                                                      | Ref.      |
|----------------------------------------------------|---------------------------------------------------------|-------------------------------------------|------------------------------------------------------------------|--------------------------------------------------------------------------------------------|-----------|
| P3HT-g-C <sub>3</sub> N <sub>4</sub><br>(melamine) | 0.25M Na <sub>2</sub> S-Na <sub>2</sub> SO <sub>3</sub> | $\lambda \geq 400$ nm                     | 560 $\mu\text{mol h}^{-1}$                                       | 2.9% ( $\lambda = 420$ nm)                                                                 | S1        |
| g-C <sub>3</sub> N <sub>4</sub> /Au/P3HT/Pt        | 10% TEOA                                                | $\lambda \geq 420$ nm                     | 320 $\mu\text{mol h}^{-1}$                                       | none                                                                                       | S2        |
| P3HT-g-C <sub>3</sub> N <sub>4</sub><br>(urea)     | 0.25M Na <sub>2</sub> S-Na <sub>2</sub> SO <sub>3</sub> | $\lambda \geq 420$ nm                     | 57 $\mu\text{mol h}^{-1}$                                        | 4.2% ( $\lambda = 420$ nm)                                                                 | S3        |
| g-C <sub>3</sub> N <sub>4</sub> -P3HT<br>(RCNTP-5) | 10% TEOA                                                | $\lambda > 420$ nm                        | 609.9 $\mu\text{mol h}^{-1} \text{g}^{-1}$                       | none                                                                                       | S4        |
| g-C <sub>3</sub> N <sub>4</sub> -PEDOT             | 10% TEOA                                                | $\lambda \geq 400$ nm                     | 32.7 $\mu\text{mol h}^{-1}$                                      | none                                                                                       | S5        |
| g-C <sub>3</sub> N <sub>4</sub> -PEDOT/P3HT        | saturated AA solution                                   | $\lambda \geq 400$ nm                     | 427703.3 $\mu\text{mol} \cdot \text{h}^{-1} \cdot \text{g}^{-1}$ | 4.4% ( $\lambda = 420$ nm),<br>10.6% ( $\lambda = 520$ nm),<br>14.9% ( $\lambda = 600$ nm) | This work |

## References

- S1. H. J. Yan and Y. Huang, *Chem. Commun.*, 2011, 47, 4168–4170.
- S2. Y. Zhang, F. Mao, H. Yan, K. Liu, H. Cao, J. Wu, D. A. Xiao, *J. Mater. Chem. A*, 2015, 3, 109–115.
- S3. X. Zhang, B. Peng, S. Zhang, & T. Peng, *ACS Sustainable Chem. Eng.*, 2015, 3, 7, 1501–1509.
- S4. M. Luo, H. Gong, W. Yang, F. He, Y. Cao, & Y. Zhang, et al., *Int. J. Hydrogen Energ.*, 2019, 44, 7108-7117.
- S5. X. Zheng, Z. Chen, Z. Xu, L. Wang, *Chem. Commun.*, 2014, 50, 6762-6764.
